# Supplementary material for: Stability, electronic structure, and optical properties of protected gold-doped silver Ag29−xAux (x = 0–5) nanoclusters
Source: Royal Society of Chemistry journal article supplement (doi:10.1039/c7cp01440f), 2017-01-01
Supplement: c7cp01440f1.pdf [file c7cp01440f1.pdf]

Electronic Supplementary Information for:

# Stability, electronic structure, and optical properties of protected gold-doped silver $\text{Ag}_{29-x}\text{Au}_x$ ( $x = 0-5$ ) nanoclusters

*Rosalba Juarez-Mosqueda,<sup>†</sup> Sami Malola,<sup>†</sup> and Hannu Häkkinen<sup>\*†‡</sup>*

<sup>†</sup>Department of Physics and <sup>‡</sup>Department of Chemistry, Nanoscience Center, University of  
Jyväskylä, FI-40014 Jyväskylä, Finland

## TABLE OF CONTENTS

Table S1: Relative energies and HOMO-LUMO energy gaps of  $[\text{Ag}_{29-x}\text{Au}_x(\text{BDT})_{12}(\text{TPP})_4]^{3-}$  nanoclusters with  $x=2-4$ .

Table S2: Atomic charges of the  $[\text{Ag}_{29-x}\text{Au}_x(\text{BDT})_{12}(\text{TPP})_4]^{3-}$  nanoclusters with structures of type **1A**, **2A**, **3A-3D**, **4A**, and **5A**.

Figure S1: Comparison between the optical spectra of  $[\text{Ag}_{29-x}\text{Au}_x(\text{BDT})_{12}(\text{TPP})_4]^{3-}$  nanoclusters, with  $x = 0-1$ , and the overlap of the  $[\text{Ag}_{29}(\text{BDT})_{12}(\text{TPP})_4]^{3-}$  structures optimized with the PBE and the van der Waals functionals.

Figure S2. Transition contribution map for the spectral features of the  $[\text{Ag}_{26}\text{Au}_3(\text{BDT})_{12}(\text{TPP})_4]^{3-}$  nanoclusters with structures **3A** and **3D**.

Figure S3. Angular-momentum-resolved PLDOS per atom type and per phenyl ring of the **1D**, **2D**, **4D**, **5D**, **3F**, and **3H** structures.

Figure S4. Evolution of the optical spectra of doped  $[\text{Ag}_{29-x}\text{Au}_x(\text{BDT})_{12}(\text{TPP})_4]^{3-}$  nanoclusters ( $x=2-4$ ) with respect to the number of Au-TPP bonds.

**Table S1.** Relative energies and HOMO-LUMO energy gaps (given in parentheses) of  $[\text{Ag}_{29-x}\text{Au}_x(\text{BDT})_{12}(\text{TPP})_4]^{3-}$  nanoclusters with  $x=2-4$ . The formula  $\text{Ag}_{29-x}\text{Au}_x@\text{Sn}$  indicates the number of Au atoms ( $x$ ) at each cluster shell ( $\text{Sn}$ )  $n$  being from 0 to 3. **xE-xH** are the labeling to specify the number of Au dopants and the type of structure. Values in bold correspond to the relative energies and HOMO-LUMO energy gaps calculated with the van der Waals functional. All energies are expressed in eV per cluster.

|              | [xE]                                              | [xF]                                              | [xG]                                                           | [xH]                                                           |
|--------------|---------------------------------------------------|---------------------------------------------------|----------------------------------------------------------------|----------------------------------------------------------------|
|              | $\text{Ag}_{29-x}\text{Au}@S0\text{-Au}_{x-1}@S2$ | $\text{Ag}_{29-x}\text{Au}@S0\text{-Au}_{x-1}@S3$ | $\text{Ag}_{29-x}\text{Au}@S0\text{-Au}_{x-2}@S1\text{-Au}@S2$ | $\text{Ag}_{29-x}\text{Au}@S0\text{-Au}_{x-2}@S1\text{-Au}@S3$ |
| <b>x = 2</b> | 0.243 (1.810)                                     | 0.369 (1.820)                                     | ----                                                           | ----                                                           |
| <b>x = 3</b> | 0.449 (1.825)<br><b>1.501 (1.699)</b>             | 0.777 (1.818)<br><b>0.942 (1.693)</b>             | 0.236 (1.831)<br><b>0.340 (1.740)</b>                          | 0.386 (1.799)<br><b>0.613 (1.733)</b>                          |
| <b>x = 4</b> | 0.560 (1.871)                                     | 1.125 (1.811)                                     | 0.236 (1.799)                                                  | 0.348 (1.786)                                                  |

**Table S2.** Atomic charges (in a.u.) of the  $[\text{Ag}_{29-x}\text{Au}_x(\text{BDT})_{12}(\text{TPP})_4]^{3-}$  nanoclusters with structures of type **1A**, **2A**, **3A-3D**, **4A**, and **5A**. The values are the average of the atomic charges per atom type at each shell. Average atomic charges of the P, C, and H atoms in the TPP molecule are shown as reference.

| atoms@shell  | Ag <sub>29</sub> | 1A      | 2A      | 3A      | 3B      | 3C      | 3D      | 4A      | 5A      | TPP  |
|--------------|------------------|---------|---------|---------|---------|---------|---------|---------|---------|------|
| <b>Ag@S0</b> | -0.0731          | ----    | ----    | ----    | 0.0165  | -0.0572 | -0.0561 | ----    | ----    | ---- |
| <b>Au@S0</b> | ----             | -0.3714 | -0.343  | -0.3096 | ----    | ----    | ----    | -0.2975 | -0.2607 | ---- |
| <b>Ag@S1</b> | 0.1257           | 0.1480  | 0.1600  | 0.1738  | 0.1667  | 0.1256  | 0.1256  | 0.1883  | 0.1996  | ---- |
| <b>Au@S1</b> | ----             | ----    | -0.1197 | -0.1224 | -0.1326 | ----    | ----    | -0.1027 | -0.0890 | ---- |
| <b>Ag@S2</b> | 0.3045           | 0.3069  | 0.3088  | 0.3111  | 0.3131  | 0.3244  | 0.3088  | 0.3112  | 0.3116  | ---- |

|              |         |         |         |         |         |         |         |         |         |         |
|--------------|---------|---------|---------|---------|---------|---------|---------|---------|---------|---------|
| <b>Au@S2</b> | ----    | ----    | ----    | ----    | ----    | 0.0655  | ----    | ----    | ----    | ----    |
| <b>Ag@S3</b> | 0.3203  | 0.3300  | 0.3254  | 0.3262  | 0.3253  | 0.3213  | 0.3181  | 0.3287  | 0.3317  | ----    |
| <b>Au@S3</b> | ----    | ----    | ----    | ----    | ----    | ----    | 0.0500  | ----    | ----    | ----    |
| <b>S</b>     | -0.2890 | -0.2841 | -0.2827 | -0.2811 | -0.2790 | -0.2646 | -0.2753 | -0.2808 | -0.2731 | ----    |
| <b>P</b>     | 1.4928  | 1.4667  | 1.5102  | 1.5020  | 1.5072  | 1.4998  | 1.5945  | 1.5313  | 1.4692  | 1.3824  |
| <b>C</b>     | -0.1033 | -0.1055 | -0.1078 | -0.1063 | -0.1041 | -0.1051 | -0.1053 | -0.1042 | -0.1057 | -0.1311 |
| <b>H</b>     | 0.0601  | 0.0622  | 0.0645  | 0.0631  | 0.0600  | 0.0614  | 0.0629  | 0.0600  | 0.0633  | 0.0651  |

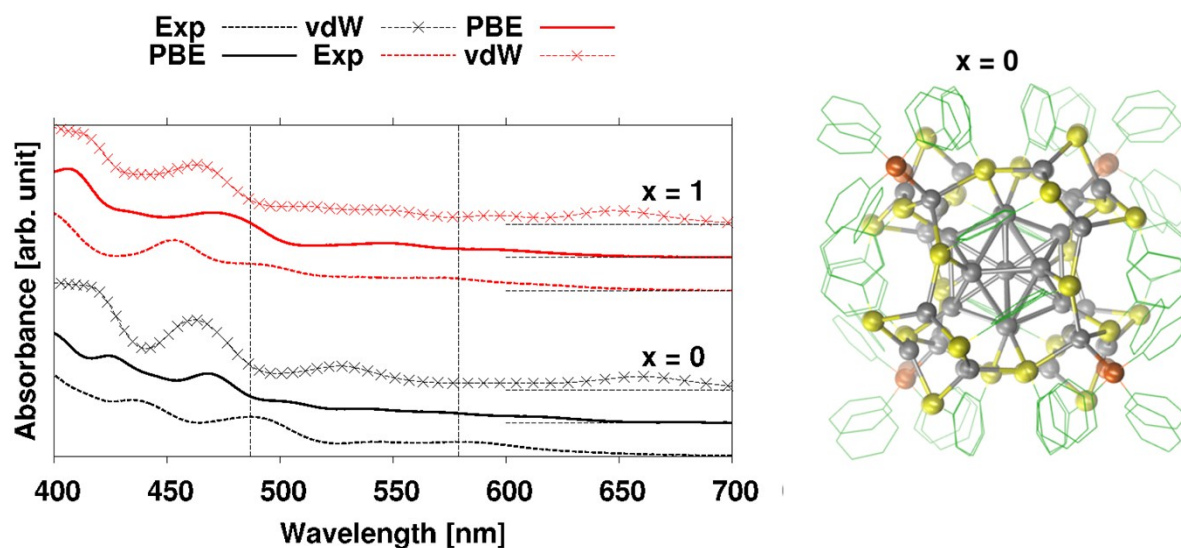

**Figure S1.** (Left) Comparison between the optical spectra of  $[\text{Ag}_{29-x}\text{Au}_x(\text{BDT})_{12}(\text{TPP})_4]^{3-}$  nanoclusters, with  $x = 0$  (black) and  $x = 1$  (red), calculated using the experimental crystal structure (dashed lines), and the optimized structures with the PBE (solid lines) and the van der Waals functional (x-dashed lines). Vertical-dashed line intersecting at 487 nm and 579 nm indicate the main absorption peaks of the experimental  $[\text{Ag}_{29}(\text{BDT})_{12}(\text{TPP})_4]^{3-}$  structure. Horizontal-dashed lines show the zero value of the absorbance in each plot. (Right) the overlap of the  $[\text{Ag}_{29}(\text{BDT})_{12}(\text{TPP})_4]^{3-}$  structures optimized with the PBE and the van der Waals functionals.

# 3A

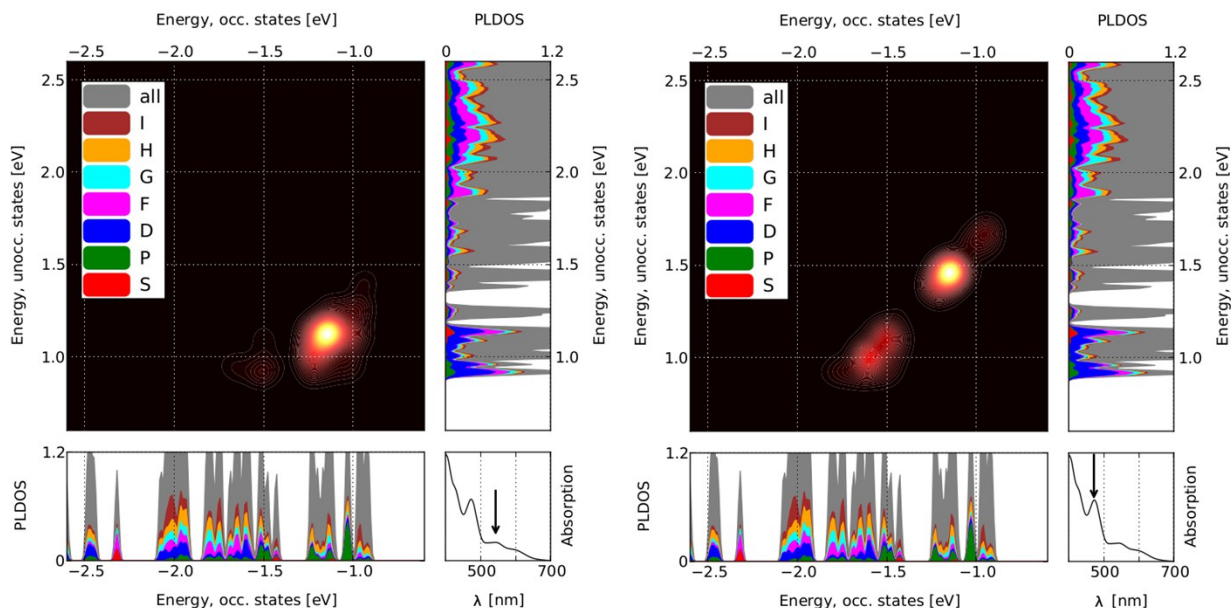

# 3D

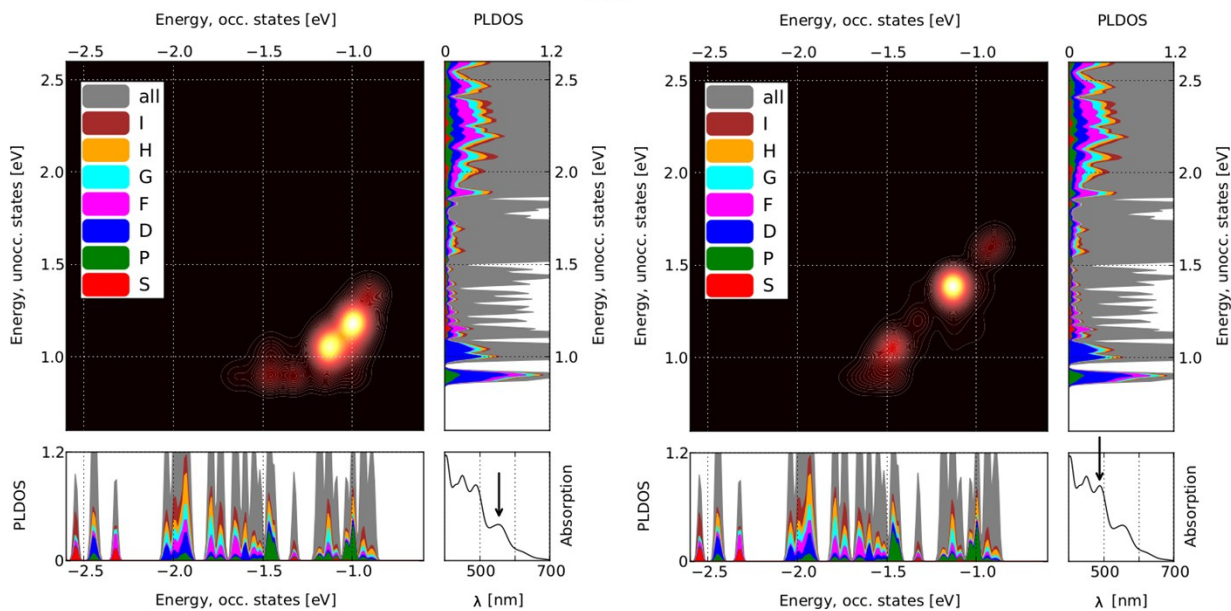

**Figure S2.** Transition contribution map for the spectral features of the  $[\text{Ag}_{26}\text{Au}_3(\text{BDT})_{12}(\text{TPP})_4]^{3-}$  nanoclusters with structures **3A** and **3D**. The electronic transitions are analyzed at 543 nm and 472 nm (**3A**), and at 555 nm and 488 nm (**3D**). The angular-momentum-resolved ( $Y_{lm}$ ) PLDOS of the occupied (bottom-left) and unoccupied (top-right)

KS states are shown below and next to the TCM. The arrows in the optical spectra (bottom-right) point to the analyzed absorption peak.

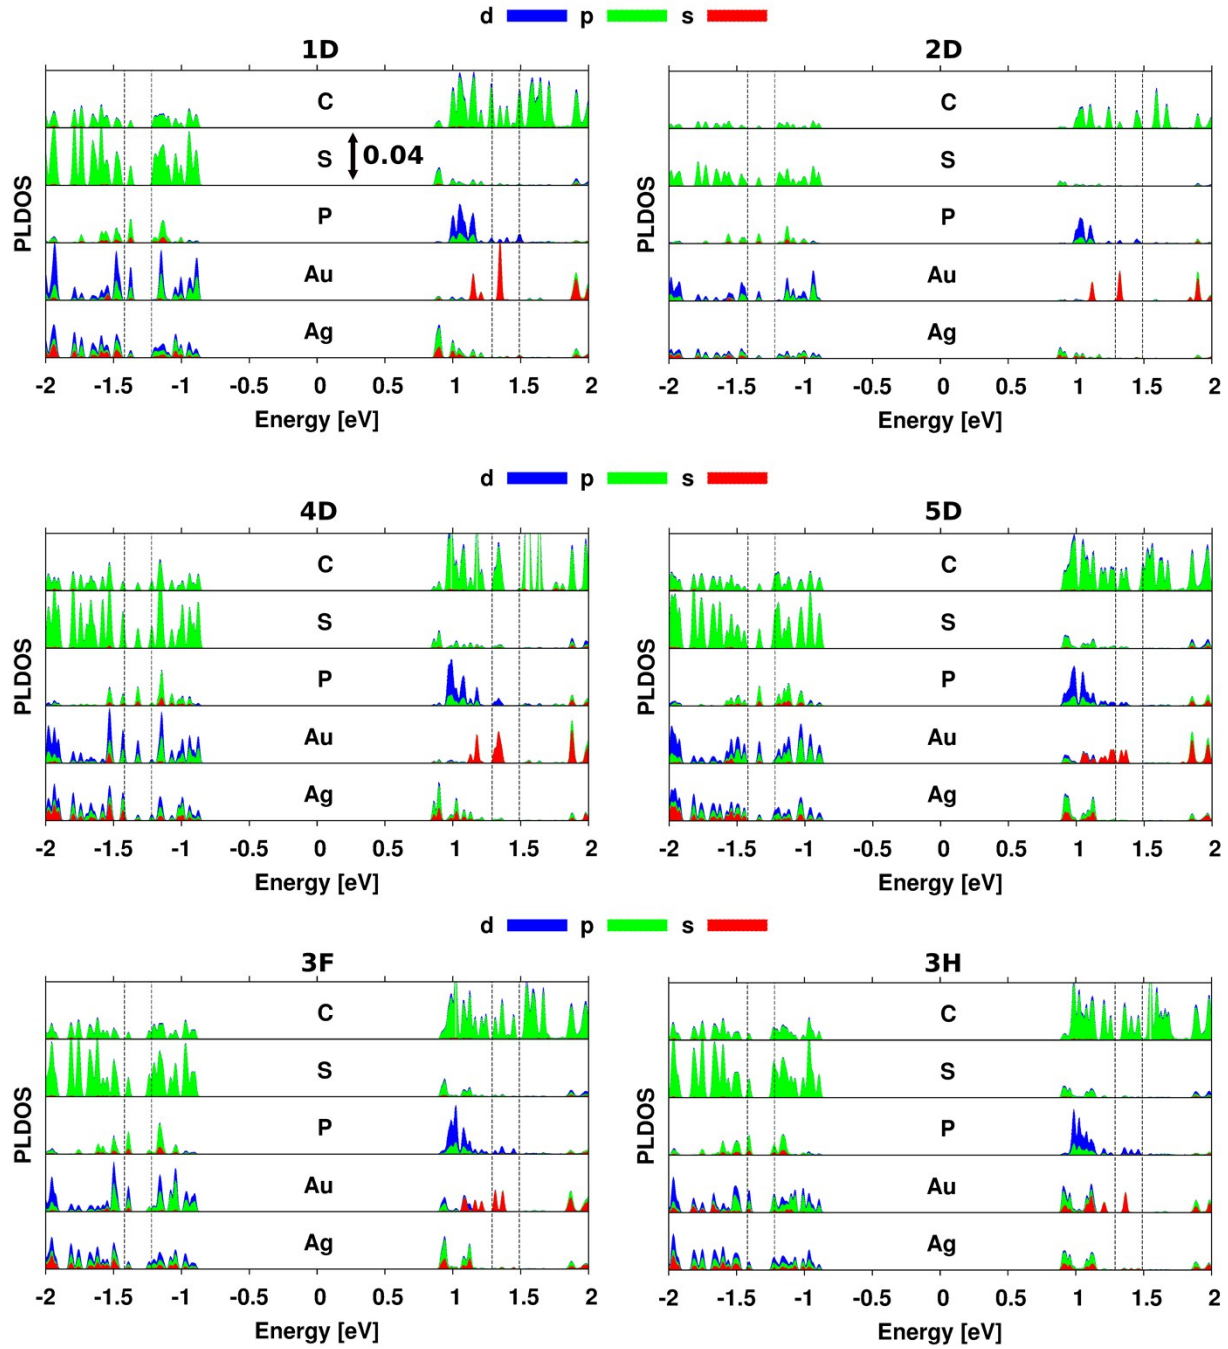

**Figure S3.** Angular-momentum-resolved ( $Y_{lm}$ ) PLDOS per atom type (Ag, Au, P, S), and per phenyl ring (in the case of C) of the 1D, 2D, 4D, 5D, 3F, and 3H structures. Blue, green, and red within the plots represent the density

of the atomic s, p and d states. Dashed lines enclosure the occupied and unoccupied states around -1.32 eV and 1.39 eV, respectively. Up-down arrow shows the  $Y_{lm} = 0.04$  scale of each plot.

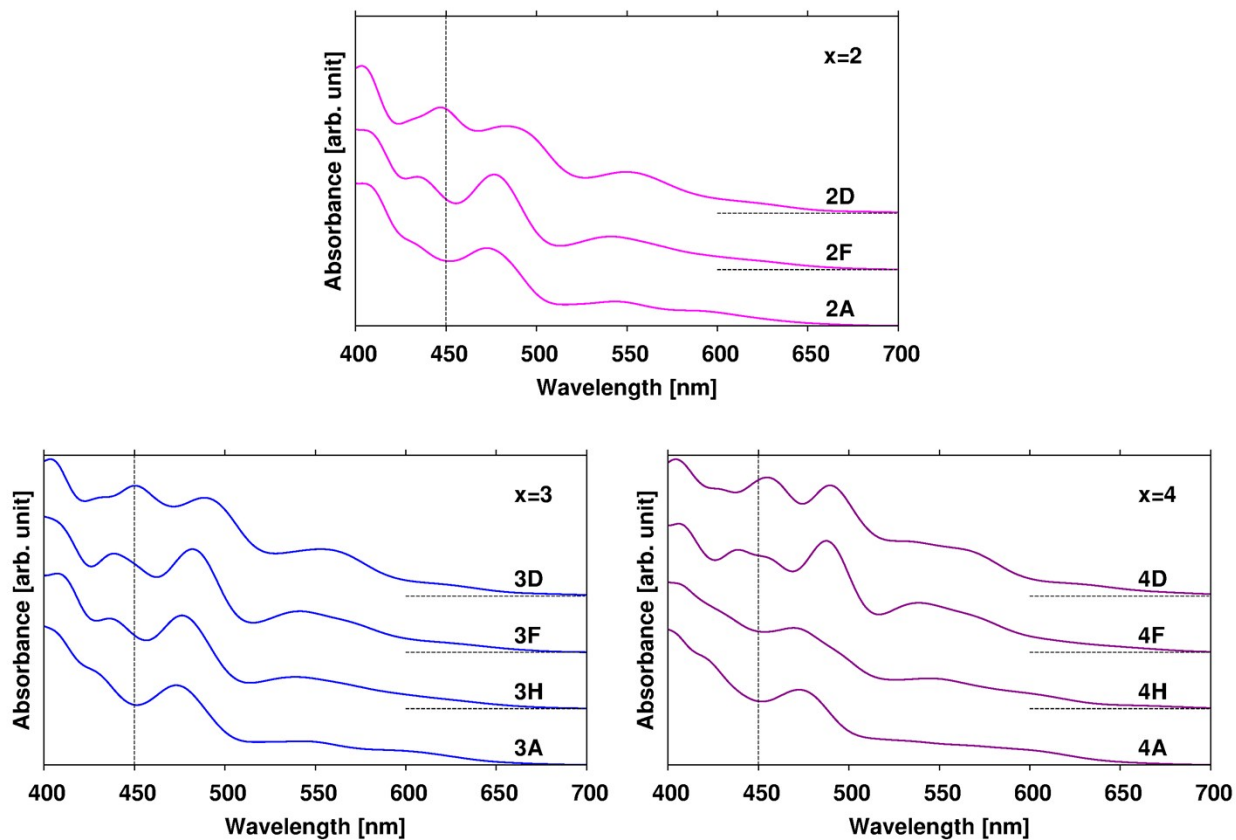

**Figure S4.** Evolution of the optical spectra of doped  $[\text{Ag}_{29-x}\text{Au}_x(\text{BDT})_{12}(\text{TPP})_4]^{3-}$  nanoclusters ( $x=2-4$ ) with respect to the number of Au-TPP bonds. The optical spectra corresponds to structures with zero (**2A**, **3A**, and **4A**), one (**2F**, **3H**, and **4H**), two (**2D** and **3F**), three (**3D** and **4F**), and four (**4D**) Au-TPP bonds. Vertical-dashed line intersecting at 450 nm is used to indicate the relative shift of the absorption peak related to the Au-TPP bonding in the doped structures.
